# Supplementary material for: Repeatability and Reproducibility of Computed Tomography Radiomics for Pulmonary Nodules: A Multicenter Phantom Study
Source: PubMed Central journal article supplement — Invest Radiol. 2021 Nov 8;57(4):242–53. doi: 10.1097/RLI.0000000000000834 (PMC8903219; doi:10.1097/rli.0000000000000834), 2021-11-08
Supplement: ir-57-242-s001.pdf [file ir-57-242-s001.pdf]

### Supplemental Digital Content

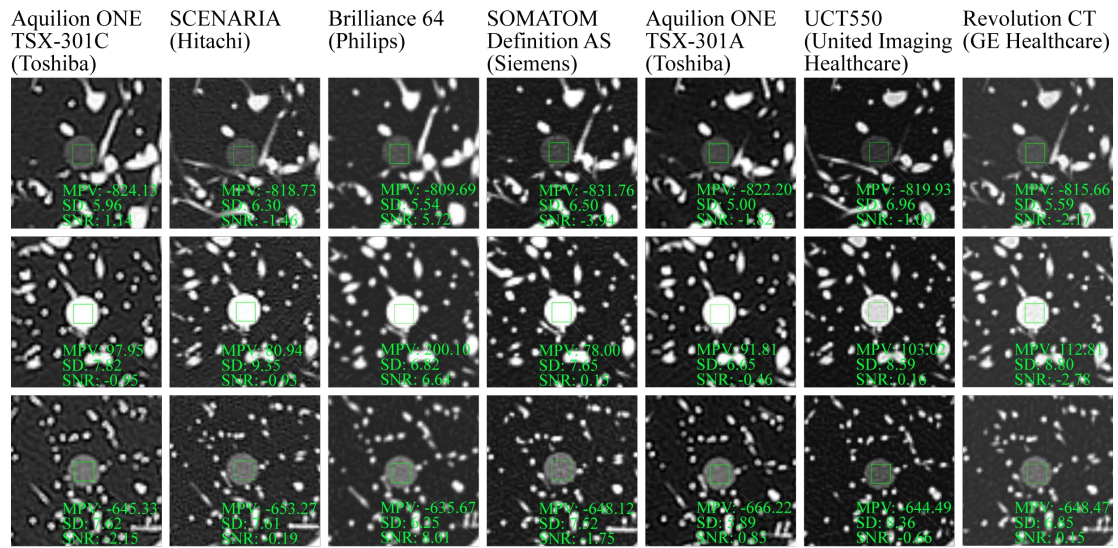

**Figure S1:** The CT images of three simulated nodules (diameter: 10 mm; CT attenuation values: -800, 100, and -630 Hounsfield units from the top to the bottom) with their internal square segmentations in the inter-CT trial. MPV = mean pixel values. SD = standard deviation. SNR = signal-to-noise ratio.

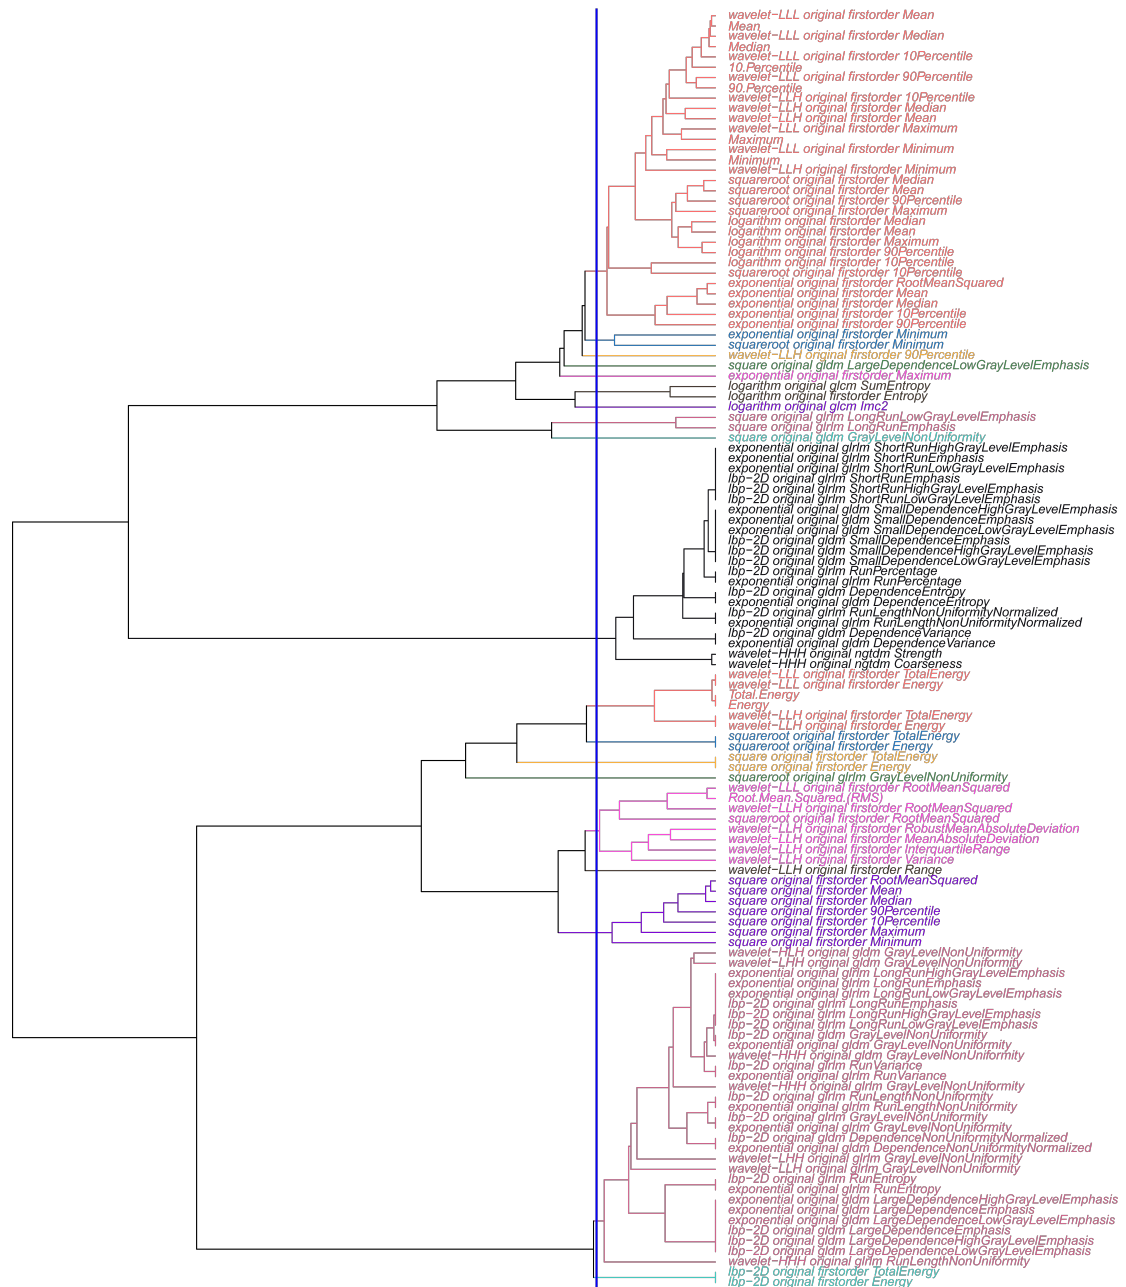

**Figure S2:** The dendrogram shows hierarchical clustering of the total intersection of 124 RFs.

The blue line was chosen to differentiate 19 separated clusters. RF = radiomic feature.

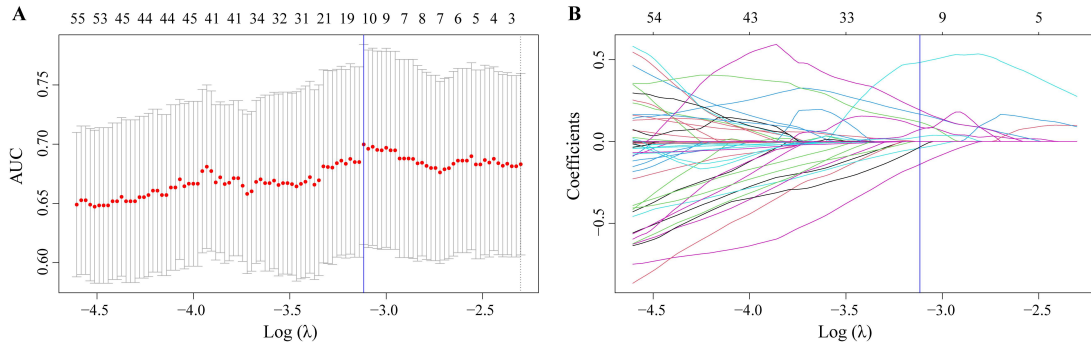

**Figure S3:** (A) RF selection with the LASSO regression model according to the AUC value. The blue vertical line was drawn at the optimal  $\lambda$  value based on the minimum criteria and 1 standard error of the minimum criteria. (B) LASSO coefficient profiles of the 1171 RFs. The blue vertical line was drawn at the optimal  $\lambda$ , which resulted in 10 non-zero coefficients. RF = radiomic feature. LASSO = least absolute shrinkage and selection operator. AUC = area under curve.

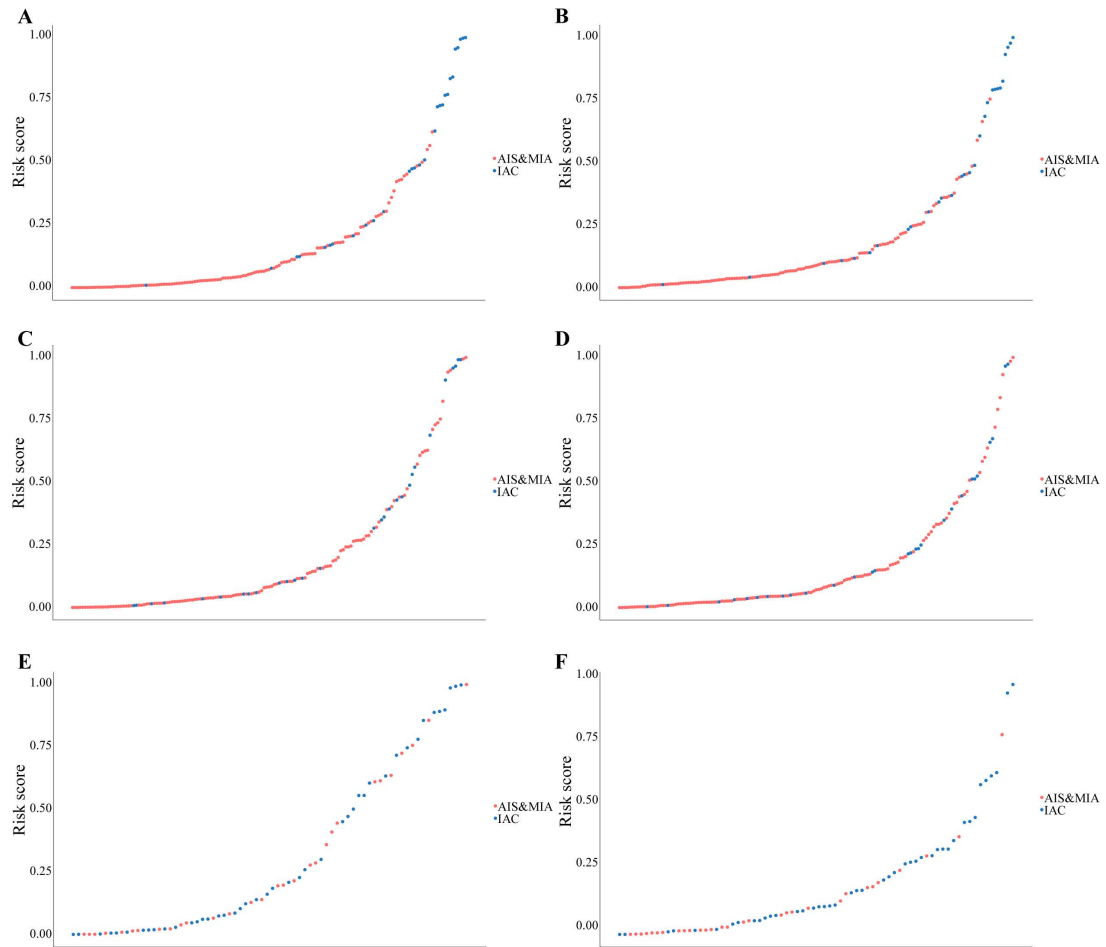

**Figure S4:** The predicted risk score of the “unstable model” in the training dataset (A), testing dataset (C), and validation dataset (E). The predicted risk score of the “stable model” in the training dataset (B), testing dataset (D), and validation dataset (F). The color of the sample point corresponds to the true pathological diagnosis. The larger the predicted risk score of a sample point, the more likely will it be predicted as an IAC. AIS = adenocarcinoma in situ. MIA = minimally invasive adenocarcinoma. IAC = invasive adenocarcinoma.

**Table S1: Characteristics of the Clinical Dataset**

|                              | Training Dataset   | Testing Dataset   | Validation Dataset | Total Dataset     |
|------------------------------|--------------------|-------------------|--------------------|-------------------|
| No. of patients <sup>a</sup> | 146                | 150               | 70                 | 353               |
| No. of lesions               | 155                | 155               | 74                 | 384               |
| CTDI (mGy) <sup>b</sup>      | 10.35 (1.10–33.40) | 9.58 (1.21–33.40) | 5.83 (2.26–14.07)  | 8.84 (1.10–33.40) |
| Age (years) <sup>c</sup>     | 51.42 ± 11.62      | 50.69 ± 10.98     | 52.19 ± 11.83      | 51.18 ± 11.40     |
| Gender                       |                    |                   |                    |                   |
| Male                         | 40/146 (27.40%)    | 37/150 (24.67%)   | 12/70 (17.14%)     | 87/353 (24.65%)   |
| Female                       | 106/146 (72.60%)   | 113/150 (75.33%)  | 58/70 (82.86%)     | 266/353 (75.35%)  |
| Pathological diagnosis       |                    |                   |                    |                   |
| AIS and MIA                  | 126/155 (81.29%)   | 126/155 (81.29%)  | 30/74 (40.54%)     | 282/384 (73.4%)   |
| IAC                          | 29/155 (18.71%)    | 29/155 (18.71%)   | 44/74 (59.46%)     | 102/384 (26.6%)   |
| Type of nodule               |                    |                   |                    |                   |
| PGGN                         | 112/155 (72.26%)   | 107/155 (69.03%)  | 40/74 (54.05%)     | 259/384 (67.4%)   |
| MGGN                         | 43/155 (27.74%)    | 48/155 (30.97%)   | 34/74 (45.95%)     | 125/384 (32.6%)   |
| Spiculation                  |                    |                   |                    |                   |
| No                           | 65/155 (41.94%)    | 69/155 (44.52%)   | 59/74 (79.73%)     | 193/384 (50.3%)   |
| Yes                          | 90/155 (58.06%)    | 86/155 (55.48%)   | 15/74 (20.27%)     | 191/384 (49.7%)   |
| Lobulation                   |                    |                   |                    |                   |
| No                           | 49/155 (31.61%)    | 53/155 (34.19%)   | 39/74 (52.70%)     | 141/384 (36.7%)   |
| Yes                          | 106/155 (68.39%)   | 102/155 (65.81%)  | 35/74 (47.30%)     | 243/384 (63.3%)   |
| Bubblelike appearance        |                    |                   |                    |                   |
| No                           | 129/155 (83.23%)   | 127/155 (81.94%)  | 55/74 (74.32%)     | 311/384 (81.0%)   |
| Yes                          | 26/155 (16.77%)    | 28/155 (18.06%)   | 19/74 (25.68%)     | 73/384 (19.0%)    |
| Tumor-lung interface (clear) |                    |                   |                    |                   |
| No                           | 27/155 (17.42%)    | 22/155 (14.19%)   | 40/74 (54.05%)     | 89/384 (23.2%)    |
| Yes                          | 128/155 (82.58%)   | 133/155 (85.81%)  | 34/74 (45.95%)     | 295/384 (76.8%)   |
| Air bronchogram              |                    |                   |                    |                   |
| No                           | 91/155 (58.71%)    | 101/155 (65.16%)  | 52/74 (70.27%)     | 244/384 (63.5%)   |
| Yes                          | 64/155 (41.29%)    | 54/155 (34.84%)   | 22/74 (29.73%)     | 140/384 (36.5%)   |
| Pulmonary vascular change    |                    |                   |                    |                   |
| No                           | 35/155 (22.58%)    | 37/155 (23.87%)   | 15/74 (20.27%)     | 87/384 (22.7%)    |
| Yes                          | 120/155 (77.42%)   | 118/155 (76.13%)  | 59/74 (79.73%)     | 297/384 (77.3%)   |
| Pleural indentation          |                    |                   |                    |                   |
| No                           | 119/155 (76.77%)   | 127/155 (81.94%)  | 55/74 (74.32%)     | 301/384 (78.4%)   |
| Yes                          | 36/155 (23.23%)    | 28/155 (18.06%)   | 19/74 (25.68%)     | 83/384 (21.6%)    |

Note.—CTDI = CT dose index. AIS = adenocarcinoma in situ. MIA = minimally invasive adenocarcinoma. IAC = invasive adenocarcinoma. PGGN = pure ground-glass nodule. MGGN = mixed ground-glass nodule.

<sup>a</sup> Since the randomization of the training and testing datasets was performed at the lesion level and divided the lesions of the same patient into different datasets, the number of some patients was double-counted so that the total patients' number of three datasets differed from the total number of patients.

<sup>b</sup> The average and range of CTDI were expressed as mean (min–max).

<sup>c</sup> Plus-minus values were mean ± SD.

**Table S2: The CT Acquisition Parameters Used for the Clinical Dataset**

| CT Scanner<br>(Manufacturer)                                 | Collimation<br>(mm) <sup>a</sup> | Tube<br>Voltage<br>(kVp) | Tube<br>Current<br>(mA) <sup>b</sup> | Rotation<br>Time (s) | Slice<br>Thickness<br>(mm) | Lung<br>Window<br>Settings -<br>Width (HU) | Lung<br>Window<br>Settings -<br>Level (HU) | Mediastinal<br>Window<br>Settings -<br>Width (HU) | Mediastinal<br>Window<br>Settings -<br>Level (HU) | Pitch |
|--------------------------------------------------------------|----------------------------------|--------------------------|--------------------------------------|----------------------|----------------------------|--------------------------------------------|--------------------------------------------|---------------------------------------------------|---------------------------------------------------|-------|
| Brilliance (Philips) <sup>c</sup>                            | 64 × 0.625                       | 120                      | 150–200                              | 0.75                 | 1                          | 1200                                       | –600                                       | 400                                               | 40                                                | 0.906 |
| Somatom Definition AS<br>(Siemens Healthineers) <sup>d</sup> | 128 × 0.6                        | 120                      | 150–200                              | 0.5                  | 1                          | 1200                                       | –600                                       | 400                                               | 40                                                | 1.2   |
| Scenaria (Hitachi) <sup>e</sup>                              | 64 × 0.625                       | 120                      | 150–200                              | 0.5                  | 1                          | 1200                                       | –600                                       | 400                                               | 40                                                | 0.906 |
| Aquilion One (Toshiba) <sup>f</sup>                          | 160 × 0.5                        | 120                      | 150–200                              | 0.6                  | 1                          | 1200                                       | –600                                       | 400                                               | 40                                                | 0.828 |

Note.—HU = Hounsfield units.

<sup>a</sup> Number of slices multiplied by thickness.

<sup>b</sup> Tube current was automatically adjusted within the range of 150-200 mA.

<sup>c</sup> Brilliance (Philips) contributed to 70 sets of CT images in the validation dataset.

<sup>d</sup> Somatom Definition AS (Siemens Healthineers) contributed to 56 sets of CT images in the training dataset and 59 in the testing dataset.

<sup>e</sup> Sixty-four channels and 128 slices. Scenaria (Hitachi) contributed to 37 sets of CT images in the training dataset and 34 in the testing dataset.

<sup>f</sup> Aquilion One (Toshiba) contributed to 53 sets of CT images in the training dataset and 57 in the testing dataset.

**Table S3: Pairwise Comparison Results Between Different CT Acquisition and Reconstruction Parameters**

| Acquisition and Reconstruction Parameter | Acquisition and Reconstruction Parameter | FDR value <sup>a</sup> |
|------------------------------------------|------------------------------------------|------------------------|
| Pitch                                    | Rotation time                            | < 0.001                |
| Pitch                                    | Tube voltage                             | 0.003                  |
| Pitch                                    | Tube current                             | 0.071                  |
| Pitch                                    | FOV                                      | 0.001                  |
| Pitch                                    | Slice thickness and slice interval       | < 0.001                |
| Pitch                                    | Reconstruction kernel                    | < 0.001                |
| Pitch                                    | Iteration level                          | < 0.001                |
| Rotation time                            | Tube voltage                             | < 0.001                |
| Rotation time                            | Tube current                             | < 0.001                |
| Rotation time                            | FOV                                      | < 0.001                |
| Rotation time                            | Slice thickness and slice interval       | < 0.001                |
| Rotation time                            | Reconstruction kernel                    | < 0.001                |
| Rotation time                            | Iteration level                          | < 0.001                |
| Tube voltage                             | Tube current                             | 0.731                  |
| Tube voltage                             | FOV                                      | < 0.001                |
| Tube voltage                             | Slice thickness and slice interval       | < 0.001                |
| Tube voltage                             | Reconstruction kernel                    | < 0.001                |
| Tube voltage                             | Iteration level                          | < 0.001                |
| Tube current                             | FOV                                      | < 0.001                |
| Tube current                             | Slice thickness and slice interval       | < 0.001                |
| Tube current                             | Reconstruction kernel                    | < 0.001                |
| Tube current                             | Iteration level                          | < 0.001                |
| FOV                                      | Slice thickness and slice interval       | 0.020                  |
| FOV                                      | Reconstruction kernel                    | < 0.001                |
| FOV                                      | Iteration level                          | < 0.001                |
| Slice thickness and slice interval       | Reconstruction kernel                    | < 0.001                |
| Slice thickness and slice interval       | Iteration level                          | < 0.001                |
| Reconstruction kernel                    | Iteration level                          | < 0.001                |

Note.—FOV = field of view. FDR = false discovery rate.

<sup>a</sup> Wilcoxon signed-rank test was employed and the results were corrected with the FDR method.

**Table S4: The Spearman's Rank Correlation Test Results Between Each Pair of Influencing Factors <sup>a</sup>**

| Influencing Factors                                    | Test-retest | Inter-CT | Pitch (Intra-CT protocol) | Rotation Time (Intra-CT protocol) | Tube Voltage (Intra-CT protocol) | Tube Current (Intra-CT protocol) | FOV (Intra-CT protocol) | Slice Thickness and Slice Interval (Intra-CT protocol) | Reconstruction Kernel (Intra-CT protocol) | Iteration Level (Intra-CT protocol) |
|--------------------------------------------------------|-------------|----------|---------------------------|-----------------------------------|----------------------------------|----------------------------------|-------------------------|--------------------------------------------------------|-------------------------------------------|-------------------------------------|
| Test-retest                                            | < 0.001     | < 0.001  | < 0.001                   | < 0.001                           | < 0.001                          | < 0.001                          | < 0.001                 | < 0.001                                                | < 0.001                                   | < 0.001                             |
| Inter-CT                                               | < 0.001     | < 0.001  | < 0.001                   | < 0.001                           | < 0.001                          | < 0.001                          | < 0.001                 | < 0.001                                                | < 0.001                                   | < 0.001                             |
| Pitch (Intra-CT protocol)                              | < 0.001     | < 0.001  | < 0.001                   | < 0.001                           | < 0.001                          | < 0.001                          | < 0.001                 | < 0.001                                                | < 0.001                                   | < 0.001                             |
| Rotation time (Intra-CT protocol)                      | < 0.001     | < 0.001  | < 0.001                   | < 0.001                           | < 0.001                          | < 0.001                          | < 0.001                 | < 0.001                                                | < 0.001                                   | < 0.001                             |
| Tube voltage (Intra-CT protocol)                       | < 0.001     | < 0.001  | < 0.001                   | < 0.001                           | < 0.001                          | < 0.001                          | < 0.001                 | < 0.001                                                | < 0.001                                   | < 0.001                             |
| Tube current (Intra-CT protocol)                       | < 0.001     | < 0.001  | < 0.001                   | < 0.001                           | < 0.001                          | < 0.001                          | < 0.001                 | < 0.001                                                | < 0.001                                   | < 0.001                             |
| FOV (Intra-CT protocol)                                | < 0.001     | < 0.001  | < 0.001                   | < 0.001                           | < 0.001                          | < 0.001                          | < 0.001                 | < 0.001                                                | < 0.001                                   | < 0.001                             |
| Slice thickness and slice interval (Intra-CT protocol) | < 0.001     | < 0.001  | < 0.001                   | < 0.001                           | < 0.001                          | < 0.001                          | < 0.001                 | < 0.001                                                | < 0.001                                   | < 0.001                             |
| Reconstruction kernel (Intra-CT protocol)              | < 0.001     | < 0.001  | < 0.001                   | < 0.001                           | < 0.001                          | < 0.001                          | < 0.001                 | < 0.001                                                | < 0.001                                   | < 0.001                             |
| Iteration level (Intra-CT protocol)                    | < 0.001     | < 0.001  | < 0.001                   | < 0.001                           | < 0.001                          | < 0.001                          | < 0.001                 | < 0.001                                                | < 0.001                                   | < 0.001                             |

Note.—FOV = field of view. FDR = false discovery rate.

<sup>a</sup> The results were corrected with the FDR method.



**Table S5: Robustness Measurement Results of 19 Representative RFs**

| Trial                                                      | Test-retest | Test-retest | Inter-CT | Pitch (Intra-CT protocol) | Rotation Time (Intra-CT protocol) | Tube Voltage (Intra-CT protocol) | Tube Current (Intra-CT protocol) | FOV (Intra-CT protocol) | Slice Thickness and Slice Interval (Intra-CT protocol) | Reconstruction Kernel (Intra-CT protocol) | Iteration Level (Intra-CT protocol) | Filter               |
|------------------------------------------------------------|-------------|-------------|----------|---------------------------|-----------------------------------|----------------------------------|----------------------------------|-------------------------|--------------------------------------------------------|-------------------------------------------|-------------------------------------|----------------------|
| Measurement                                                | CCC         | DR          | ICC      | ICC                       | ICC                               | ICC                              | ICC                              | ICC                     | ICC                                                    | ICC                                       | ICC                                 |                      |
| Energy                                                     | 0.989       | 0.970       | 0.989    | 0.989                     | 0.992                             | 0.990                            | 0.989                            | 0.904                   | 0.984                                                  | 1.000                                     | 1.000                               | Original             |
| Mean                                                       | 1.000       | 0.994       | 0.996    | 1.000                     | 1.000                             | 0.999                            | 1.000                            | 1.000                   | 0.993                                                  | 1.000                                     | 1.000                               | Original             |
| wavelet.LLH_original_firstorder_90Percentile               | 0.939       | 0.908       | 0.922    | 0.919                     | 0.941                             | 0.939                            | 0.940                            | 0.929                   | 0.940                                                  | 0.970                                     | 0.953                               | Wavelet-LLH          |
| wavelet.LLH_original_firstorder_Range                      | 0.929       | 0.906       | 0.930    | 0.932                     | 0.937                             | 0.968                            | 0.958                            | 0.936                   | 0.930                                                  | 0.964                                     | 0.970                               | Wavelet-LLH          |
| wavelet.LLL_original_firstorder_RootMeanSquared            | 0.999       | 0.990       | 0.994    | 1.000                     | 0.999                             | 0.999                            | 1.000                            | 0.999                   | 0.999                                                  | 1.000                                     | 1.000                               | Wavelet-LLL          |
| square_original_firstorder_Energy                          | 0.899       | 0.933       | 0.794    | 0.950                     | 0.987                             | 0.881                            | 0.969                            | 0.906                   | 0.970                                                  | 0.988                                     | 0.998                               | Square               |
| square_original_firstorder_Median                          | 0.957       | 0.948       | 0.898    | 0.992                     | 0.998                             | 0.972                            | 0.994                            | 0.993                   | 0.997                                                  | 0.998                                     | 0.999                               | Square               |
| square_original_gldm_GrayLevelNonUniformity                | 0.979       | 0.959       | 0.925    | 0.989                     | 0.995                             | 0.981                            | 0.974                            | 0.898                   | 0.966                                                  | 0.762                                     | 0.976                               | Square               |
| square_original_gldm_LargeDependenceLowGrayLevelEmphasis   | 0.989       | 0.973       | 0.922    | 0.999                     | 0.998                             | 0.999                            | 0.999                            | 0.993                   | 0.993                                                  | 0.765                                     | 0.999                               | Square               |
| square_original_gldm_LongRunLowGrayLevelEmphasis           | 0.915       | 0.948       | 0.810    | 0.982                     | 0.992                             | 0.982                            | 0.993                            | 0.901                   | 0.982                                                  | 0.886                                     | 0.989                               | Square               |
| squareroot_original_firstorder_Energy                      | 0.949       | 0.940       | 0.865    | 0.973                     | 0.992                             | 0.912                            | 0.976                            | 0.868                   | 0.976                                                  | 0.995                                     | 0.999                               | Square root          |
| squareroot_original_gldm_GrayLevelNonUniformity            | 0.953       | 0.933       | 0.887    | 0.932                     | 0.967                             | 0.822                            | 0.889                            | 0.867                   | 0.931                                                  | 0.845                                     | 0.865                               | Square root          |
| logarithm_original_firstorder_Entropy                      | 0.972       | 0.937       | 0.887    | 0.965                     | 0.980                             | 0.926                            | 0.964                            | 0.984                   | 0.949                                                  | 0.788                                     | 0.917                               | Logarithm            |
| logarithm_original_gldm_Imc2                               | 0.919       | 0.909       | 0.846    | 0.952                     | 0.962                             | 0.878                            | 0.944                            | 0.970                   | 0.950                                                  | 0.804                                     | 0.921                               | Logarithm            |
| exponential_original_firstorder_Maximum                    | 0.960       | 0.954       | 0.917    | 0.935                     | 0.888                             | 0.937                            | 0.942                            | 0.921                   | 0.855                                                  | 0.809                                     | 0.981                               | Exponential          |
| exponential_original_firstorder_Minimum                    | 0.936       | 0.938       | 0.908    | 0.974                     | 0.971                             | 0.990                            | 0.975                            | 0.991                   | 0.874                                                  | 0.960                                     | 0.982                               | Exponential          |
| exponential_original_gldm_RunEntropy                       | 0.980       | 0.961       | 0.981    | 0.978                     | 0.974                             | 0.970                            | 0.984                            | 0.804                   | 0.972                                                  | 1.000                                     | 1.000                               | Exponential          |
| exponential_original_gldm_RunLengthNonUniformityNormalized | 0.978       | 0.956       | 0.978    | 0.977                     | 0.972                             | 0.964                            | 0.979                            | 0.781                   | 0.970                                                  | 1.000                                     | 1.000                               | Exponential          |
| lbp.2D_original_firstorder_Energy                          | 0.939       | 0.903       | 0.913    | 0.940                     | 0.967                             | 0.947                            | 0.945                            | 0.795                   | 0.892                                                  | 0.784                                     | 0.992                               | Local binary pattern |

Note.—RF = radiomic feature. FOV = field of view. CCC = concordance correlation coefficient. DR = dynamic range. ICC = intraclass correlation coefficient.

**Table S6: Differential Analysis Results (FDR Values <sup>a</sup>) of 19 Representative RFs in Pathological Diagnosis and Semantic Features**

|                                                              | Pathological<br>Diagnosis | Type of<br>Nodule | Spiculation | Lobulation | Bubblelike<br>Appearance | Tumor-lung<br>Interface | Air<br>Bronchogram | Pulmonary<br>Vascular<br>Change | Pleural<br>Indentation |
|--------------------------------------------------------------|---------------------------|-------------------|-------------|------------|--------------------------|-------------------------|--------------------|---------------------------------|------------------------|
| Energy                                                       | 0.038                     | 0.231             | 0.523       | 0.354      | 0.117                    | 0.052                   | 0.986              | 0.123                           | 0.359                  |
| Mean                                                         | < 0.001                   | < 0.001           | 0.010       | 0.004      | 0.284                    | 0.734                   | 0.019              | 0.012                           | 0.002                  |
| wavelet.LLH_original_firstorder_90Percentile                 | 0.033                     | < 0.001           | 0.220       | 0.900      | 0.257                    | 0.234                   | 0.064              | 0.085                           | 0.374                  |
| wavelet.LLH_original_firstorder_Range                        | < 0.001                   | < 0.001           | 0.112       | 0.161      | 0.179                    | 0.017                   | 0.010              | 0.012                           | 0.667                  |
| wavelet.LLL_original_firstorder_RootMeanSquared              | < 0.001                   | < 0.001           | 0.025       | 0.008      | 0.305                    | 0.726                   | 0.050              | 0.010                           | 0.003                  |
| square_original_firstorder_Energy                            | 0.496                     | 0.700             | 0.019       | 0.711      | 0.170                    | 0.025                   | 0.269              | 0.706                           | 0.737                  |
| square_original_firstorder_Median                            | 0.001                     | < 0.001           | 0.001       | 0.025      | 0.008                    | 0.222                   | 0.082              | 0.011                           | 0.063                  |
| square_original_gldm_GrayLevelNonUniformity                  | < 0.001                   | 0.070             | 0.016       | 0.019      | 0.005                    | 0.711                   | 0.411              | 0.024                           | 0.085                  |
| square_original_gldm_LargeDependenceLowGrayLevelEmphasis     | < 0.001                   | < 0.001           | < 0.001     | 0.006      | 0.008                    | 0.185                   | 0.052              | 0.054                           | 0.031                  |
| square_original_glrmlm_LongRunLowGrayLevelEmphasis           | < 0.001                   | < 0.001           | < 0.001     | 0.010      | 0.006                    | 0.247                   | 0.055              | 0.122                           | 0.027                  |
| squareroot_original_firstorder_Energy                        | 0.018                     | 0.354             | 0.136       | 0.038      | 0.005                    | 0.371                   | 0.354              | 0.054                           | 0.201                  |
| squareroot_original_glrmlm_GrayLevelNonUniformity            | 0.494                     | 0.206             | 0.024       | 0.829      | 0.354                    | 0.112                   | 0.234              | 0.442                           | 0.746                  |
| logarithm_original_firstorder_Entropy                        | < 0.001                   | < 0.001           | < 0.001     | 0.005      | 0.007                    | 0.838                   | 0.006              | 0.013                           | 0.017                  |
| logarithm_original_gldm_Imc2                                 | < 0.001                   | < 0.001           | < 0.001     | 0.010      | 0.030                    | 0.354                   | 0.007              | 0.185                           | 0.095                  |
| exponential_original_firstorder_Maximum                      | < 0.001                   | < 0.001           | 0.001       | 0.002      | 0.106                    | 0.354                   | 0.007              | 0.010                           | 0.011                  |
| exponential_original_firstorder_Minimum                      | 0.168                     | 0.063             | 0.144       | 0.668      | 0.095                    | 0.112                   | 0.368              | 0.220                           | 0.672                  |
| exponential_original_glrmlm_RunEntropy                       | < 0.001                   | 0.001             | 0.706       | 0.055      | 0.062                    | 0.616                   | 0.668              | 0.029                           | 0.002                  |
| exponential_original_glrmlm_RunLengthNonUniformityNormalized | < 0.001                   | 0.007             | 0.916       | 0.084      | 0.066                    | 0.916                   | 0.838              | 0.055                           | 0.005                  |
| lbp.2D_original_firstorder_Energy                            | < 0.001                   | 0.010             | 0.900       | 0.117      | 0.097                    | 0.017                   | 0.253              | 0.010                           | 0.011                  |

Note.—FDR = false discovery rate. RF = radiomic feature.

<sup>a</sup> Wilcoxon rank-sum test was employed and the results were corrected with the FDR method.

**Table S7: Differential Analysis Results (AUC with 95% CI) of 19 Representative RFs in Pathological Diagnosis and Semantic Features**

|                                                            | Pathological Diagnosis | Type of Nodule      | Spiculation         | Lobulation          | Bubblelike Appearance | Tumor-lung Interface | Air Bronchogram     | Pulmonary Vascular Change | Pleural Indentation |
|------------------------------------------------------------|------------------------|---------------------|---------------------|---------------------|-----------------------|----------------------|---------------------|---------------------------|---------------------|
| Energy                                                     | 0.579 (0.517–0.640)    | 0.543 (0.483–0.604) | 0.522 (0.464–0.580) | 0.532 (0.471–0.594) | 0.567 (0.495–0.639)   | 0.578 (0.506–0.650)  | 0.501 (0.441–0.560) | 0.562 (0.491–0.632)       | 0.537 (0.471–0.604) |
| Mean                                                       | 0.720 (0.662–0.778)    | 0.845 (0.801–0.889) | 0.587 (0.530–0.644) | 0.603 (0.545–0.662) | 0.546 (0.474–0.618)   | 0.514 (0.445–0.583)  | 0.581 (0.524–0.639) | 0.601 (0.531–0.670)       | 0.626 (0.558–0.695) |
| wavelet.LLH_original_firstorder_90Percentile               | 0.581 (0.516–0.645)    | 0.632 (0.571–0.692) | 0.542 (0.484–0.599) | 0.505 (0.443–0.567) | 0.549 (0.474–0.623)   | 0.548 (0.477–0.618)  | 0.564 (0.506–0.623) | 0.569 (0.498–0.640)       | 0.536 (0.470–0.602) |
| wavelet.LLH_original_firstorder_Range                      | 0.636 (0.576–0.696)    | 0.627 (0.570–0.684) | 0.553 (0.496–0.611) | 0.549 (0.487–0.611) | 0.558 (0.486–0.630)   | 0.595 (0.526–0.665)  | 0.591 (0.534–0.648) | 0.600 (0.528–0.673)       | 0.519 (0.453–0.586) |
| wavelet.LLL_original_firstorder_RootMeanSquared            | 0.722 (0.664–0.780)    | 0.834 (0.789–0.88)  | 0.575 (0.518–0.632) | 0.593 (0.534–0.652) | 0.544 (0.473–0.616)   | 0.514 (0.446–0.583)  | 0.569 (0.511–0.627) | 0.604 (0.534–0.673)       | 0.624 (0.555–0.693) |
| square_original_firstorder_Energy                          | 0.526 (0.460–0.593)    | 0.515 (0.455–0.575) | 0.578 (0.521–0.635) | 0.487 (0.426–0.547) | 0.559 (0.479–0.639)   | 0.589 (0.519–0.660)  | 0.539 (0.479–0.598) | 0.516 (0.445–0.587)       | 0.514 (0.444–0.584) |
| square_original_firstorder_Median                          | 0.622 (0.559–0.685)    | 0.656 (0.598–0.713) | 0.613 (0.557–0.669) | 0.578 (0.519–0.637) | 0.616 (0.541–0.690)   | 0.549 (0.480–0.617)  | 0.561 (0.502–0.619) | 0.602 (0.530–0.673)       | 0.576 (0.506–0.645) |
| square_original_gldm_GrayLevelNonUniformity                | 0.644 (0.584–0.704)    | 0.565 (0.504–0.625) | 0.581 (0.524–0.638) | 0.582 (0.522–0.641) | 0.623 (0.550–0.697)   | 0.515 (0.446–0.585)  | 0.529 (0.469–0.588) | 0.591 (0.518–0.663)       | 0.570 (0.502–0.639) |
| square_original_gldm_LargeDependenceLowGrayLevelEmphasis   | 0.658 (0.595–0.721)    | 0.725 (0.671–0.778) | 0.626 (0.570–0.682) | 0.598 (0.540–0.656) | 0.615 (0.540–0.690)   | 0.553 (0.482–0.624)  | 0.568 (0.510–0.627) | 0.577 (0.504–0.651)       | 0.588 (0.519–0.657) |
| square_original_gldm_LongRunLowGrayLevelEmphasis           | 0.649 (0.586–0.712)    | 0.718 (0.664–0.772) | 0.626 (0.570–0.682) | 0.590 (0.532–0.649) | 0.619 (0.546–0.693)   | 0.546 (0.475–0.618)  | 0.567 (0.508–0.626) | 0.562 (0.490–0.633)       | 0.590 (0.523–0.657) |
| squareroot_original_firstorder_Energy                      | 0.590 (0.529–0.651)    | 0.533 (0.473–0.594) | 0.550 (0.492–0.608) | 0.572 (0.512–0.633) | 0.623 (0.551–0.696)   | 0.535 (0.466–0.605)  | 0.533 (0.473–0.592) | 0.578 (0.505–0.650)       | 0.553 (0.486–0.619) |
| squareroot_original_gldm_GrayLevelNonUniformity            | 0.527 (0.463–0.591)    | 0.546 (0.485–0.606) | 0.576 (0.519–0.633) | 0.508 (0.448–0.568) | 0.540 (0.461–0.619)   | 0.563 (0.492–0.635)  | 0.542 (0.482–0.601) | 0.531 (0.460–0.603)       | 0.513 (0.445–0.581) |
| logarithm_original_firstorder_Entropy                      | 0.659 (0.598–0.719)    | 0.713 (0.659–0.767) | 0.631 (0.575–0.686) | 0.601 (0.542–0.659) | 0.617 (0.542–0.691)   | 0.508 (0.440–0.577)  | 0.598 (0.540–0.655) | 0.599 (0.527–0.671)       | 0.597 (0.530–0.665) |
| logarithm_original_gldm_Imc2                               | 0.633 (0.571–0.695)    | 0.727 (0.675–0.779) | 0.626 (0.571–0.682) | 0.591 (0.531–0.651) | 0.592 (0.515–0.670)   | 0.537 (0.465–0.610)  | 0.595 (0.538–0.653) | 0.553 (0.482–0.625)       | 0.568 (0.502–0.635) |
| exponential_original_firstorder_Maximum                    | 0.699 (0.642–0.757)    | 0.798 (0.748–0.847) | 0.615 (0.559–0.671) | 0.608 (0.550–0.666) | 0.569 (0.500–0.638)   | 0.537 (0.466–0.609)  | 0.596 (0.538–0.653) | 0.604 (0.533–0.675)       | 0.604 (0.536–0.673) |
| exponential_original_firstorder_Minimum                    | 0.553 (0.484–0.622)    | 0.566 (0.505–0.628) | 0.549 (0.491–0.607) | 0.484 (0.424–0.544) | 0.572 (0.492–0.651)   | 0.563 (0.495–0.632)  | 0.531 (0.471–0.591) | 0.550 (0.479–0.620)       | 0.519 (0.446–0.591) |
| exponential_original_gldm_RunEntropy                       | 0.676 (0.618–0.735)    | 0.619 (0.560–0.678) | 0.513 (0.455–0.572) | 0.567 (0.506–0.628) | 0.580 (0.507–0.653)   | 0.521 (0.447–0.596)  | 0.516 (0.457–0.575) | 0.587 (0.518–0.657)       | 0.625 (0.558–0.693) |
| exponential_original_gldm_RunLengthNonUniformityNormalized | 0.643 (0.581–0.705)    | 0.598 (0.538–0.658) | 0.503 (0.445–0.562) | 0.560 (0.500–0.621) | 0.578 (0.505–0.651)   | 0.496 (0.421–0.571)  | 0.507 (0.448–0.567) | 0.577 (0.508–0.646)       | 0.616 (0.549–0.683) |
| lbp.2D_original_firstorder_Energy                          | 0.688 (0.634–0.743)    | 0.594 (0.535–0.652) | 0.496 (0.437–0.554) | 0.555 (0.493–0.616) | 0.571 (0.502–0.640)   | 0.595 (0.525–0.666)  | 0.54 (0.482–0.598)  | 0.605 (0.533–0.678)       | 0.603 (0.537–0.670) |

Note.—AUC = area under curve. CI = confidence interval. RF = radiomic feature.

**Table S8: The “Unstable Model” made from 1171 Unstable RFs**

|                                                         | Coefficient <sup>a</sup> | OR (95%CI)            | <i>p</i> value |
|---------------------------------------------------------|--------------------------|-----------------------|----------------|
| (Intercept)                                             | -2.058 ± 10.664          |                       | 0.847          |
| Dependence.Entropy.(DE)                                 | -0.040 ± 2.496           | 0.961 (0.007–123.826) | 0.987          |
| Small.Dependence.Low.Gray.Level.Emphasis.(SDLGLE)       | -273.153 ± 128.240       | 0.000 (0.000–0.000)   | 0.033          |
| wavelet.HLL_original_glcM_ClusterShade                  | -0.002 ± 0.001           | 0.998 (0.995–1.000)   | 0.127          |
| wavelet.HHH_original_glrIm_LongRunHighGrayLevelEmphasis | -0.030 ± 0.011           | 0.970 (0.947–0.989)   | 0.007          |
| wavelet.LLL_original_glcM_DifferenceVariance            | -0.021 ± 0.019           | 0.980 (0.942–1.016)   | 0.281          |
| square_original_glcM_ClusterShade                       | 0.011 ± 0.005            | 1.011 (1.001–1.022)   | 0.039          |
| squareroot_original_glcM_JointEntropy                   | 0.847 ± 0.494            | 2.333 (0.941–6.598)   | 0.086          |
| gradient_original_glcM_ClusterShade                     | 0.002 ± 0.005            | 1.002 (0.993–1.014)   | 0.625          |
| gradient_original_gldM_DependenceEntropy                | -0.648 ± 3.215           | 0.523 (0.001–308.705) | 0.840          |
| gradient_original_gldM_GrayLevelVariance                | 0.220 ± 0.215            | 1.246 (0.822–1.931)   | 0.307          |

Note.—RF = radiomic feature. OR = odds ratio. CI = confidence interval.

<sup>a</sup> Plus-minus values were mean ± SD.

**Table S9: The “Stable Model” made of 19 Representative RFs**

|                                                             | Coefficient <sup>a</sup> | OR (95%CI)                                             | <i>p</i> value |
|-------------------------------------------------------------|--------------------------|--------------------------------------------------------|----------------|
| (Intercept)                                                 | 1.655 ± 19.277           |                                                        | 0.932          |
| Energy                                                      | 0.000 ± 0.000            | 1.000 (1.000–1.000)                                    | 0.447          |
| Mean                                                        | 0.053 ± 0.049            | 1.055 (0.962–1.167)                                    | 0.271          |
| wavelet.LLH_original_firstorder_90Percentile                | -0.023 ± 0.010           | 0.977 (0.957–0.994)                                    | 0.015          |
| wavelet.LLH_original_firstorder_Range                       | 0.003 ± 0.001            | 1.003 (1.001–1.005)                                    | 0.004          |
| wavelet.LLL_original_firstorder_RootMeanSquared             | 0.014 ± 0.018            | 1.014 (0.981–1.052)                                    | 0.435          |
| square_original_firstorder_Energy                           | 0.000 ± 0.000            | 1.000 (1.000–1.000)                                    | 0.013          |
| square_original_firstorder_Median                           | -0.013 ± 0.017           | 0.987 (0.953–1.019)                                    | 0.459          |
| square_original_gldm_GrayLevelNonUniformity                 | 0.004 ± 0.014            | 1.005 (0.978–1.035)                                    | 0.747          |
| square_original_gldm_LargeDependenceLowGrayLevelEmphasis    | -0.020 ± 0.020           | 0.980 (0.940–1.020)                                    | 0.324          |
| square_original_glrlm_LongRunLowGrayLevelEmphasis           | 0.157 ± 0.358            | 1.169 (0.535–2.462)                                    | 0.662          |
| squareroot_original_firstorder_Energy                       | 0.000 ± 0.000            | 1.000 (1.000–1.000)                                    | 0.776          |
| squareroot_original_glrlm_GrayLevelNonUniformity            | -0.251 ± 0.115           | 0.778 (0.615–0.965)                                    | 0.029          |
| logarithm_original_firstorder_Entropy                       | -1.854 ± 2.533           | 0.157 (0.002–24.557)                                   | 0.464          |
| logarithm_original_gldm_Imc2                                | -7.744 ± 5.950           | 0.000 (0.000–32.611)                                   | 0.193          |
| exponential_original_firstorder_Maximum                     | 0.560 ± 0.649            | 1.750 (0.562–7.097)                                    | 0.389          |
| exponential_original_firstorder_Minimum                     | 7.456 ± 9.107            | 1730.994 (0.000–6.835×10 <sup>10</sup> )               | 0.413          |
| exponential_original_glrlm_RunEntropy                       | 5.938 ± 3.533            | 379.304 (0.450–6.006×10 <sup>5</sup> )                 | 0.093          |
| exponential_original_glrlm_RunLengthNonUniformityNormalized | 26.199 ± 16.500          | 2.388×10 <sup>11</sup> (0.002–1.441×10 <sup>26</sup> ) | 0.112          |
| lbp.2D_original_firstorder_Energy                           | 0.000 ± 0.000            | 1.000 (1.000–1.000)                                    | 0.818          |

Note.—RF = radiomic feature. OR = odds ratio. CI = confidence interval.

<sup>a</sup> Plus-minus values were mean ± SD.
